# Supplementary material for: Physiological characterization of electrodermal activity enables scalable near real-time autonomic nervous system activation inference
Source: PubMed Central journal article supplement (PMC9333288; doi:10.1371/journal.pcbi.1010275), 2022-07-28
Supplement: pcbi.1010275.s002.pdf [file pcbi.1010275.s002.pdf]

Md. Rafiul Amin<sup>1</sup>, Rose T. Faghih<sup>1</sup>,

<sup>1</sup> Department of Electrical and Computer Engineering, University of Houston, Houston, Texas, USA

**S2 Appendix. Heuristic Refinement of  $\mathbf{u}$ .** Similar to our previous deconvolution approaches [1–3], we perform a heuristic refinement to enforce a constraint on the maximum number of nonzero values in  $\mathbf{u}$  and a minimum spacing between two consecutive impulses. In each iteration of the re-weighting step, we perform the following two steps for enforcing these constraints:

- Detect the nonzero values having time distance less than the selected minimum peak to peak distance  $\Delta_p$  ( $\Delta_p = 1$  second in our case). Retain only the largest impulses among the adjacent impulses within the  $\Delta_p$  window.
- If  $\|\mathbf{u}^{(i,r)}\|_0 > N_{\mathbf{u}}^{\max}$ , select  $N_{\mathbf{u}}^{\max}$  largest values of elements of  $\mathbf{u}^{(i,r)}$  and set all other elements to zero.

We choose  $N_{\mathbf{u}}^{\max} = N_{\text{peaks}} + 20$ .  $N_{\text{peaks}}$  is the number of peaks detected on the raw SC recording using MATLAB *findpeaks* function with a peak prominence of  $5 \times 10^{-4}$  and a peak to peak distance of 1 second. Further, we have selected  $u_{th} = 0.03$  in this study for thresholding.

## References

1. Amin MR, Faghih RT. Identification of Sympathetic Nervous System Activation from Skin Conductance: A Sparse Decomposition Approach with Physiological Priors. *IEEE Transactions on Biomedical Engineering*. 2020;.
2. Amin MR, Faghih RT. Robust Inference of Autonomic Nervous System Activation Using Skin Conductance Measurements: A Multi-Channel Sparse System Identification Approach. *IEEE Access*. 2019;7:173419–173437.
3. Amin MR, Faghih RT. Sparse Deconvolution of Electrodermal Activity via Continuous-Time System Identification. *IEEE Transactions on Biomedical Engineering*. 2019;.
